# Supplementary material
Source: PubMed Central journal article supplement (PMC11372729)
Supplement: NIHMS1853903-supplement-1.pdf [file NIHMS1853903-supplement-1.pdf]

**Supplemental Table 1**

**Comparison of factors associated with not meeting the 1-year hormone therapy benchmark.**

| Patient characteristic (n=241) <sup>a</sup>                                                        | > 1 year<br>(n = 9), n (%) | ≤ 1 year<br>(n = 232), n (%) | p-value                 |
|----------------------------------------------------------------------------------------------------|----------------------------|------------------------------|-------------------------|
| Age in years, mean (SD)                                                                            | 50 (9)                     | 61 (12)                      | <b>.005<sup>d</sup></b> |
| Race/Ethnicity                                                                                     |                            |                              | .078 <sup>c</sup>       |
| White                                                                                              | 5 (56)                     | 165 (72)                     |                         |
| Chinese origin                                                                                     | 0 (0)                      | 29 (13)                      |                         |
| Black/African-American                                                                             | 3 (33)                     | 21 (9)                       |                         |
| Others                                                                                             | 1 (11)                     | 15 (7)                       |                         |
| Language                                                                                           |                            |                              | 1.000 <sup>c</sup>      |
| English                                                                                            | 8 (89)                     | 197 (85)                     |                         |
| All others                                                                                         | 1 (11)                     | 35 (15)                      |                         |
| Census tract median household income, median (25 <sup>th</sup> , 75 <sup>th</sup> percentiles), \$ | 53,517 (39,464-71,275)     | 74,357 (60,077-94,229)       | .1008 <sup>e</sup>      |
| Insurance                                                                                          |                            |                              | 1.000 <sup>c</sup>      |
| Private                                                                                            | 4 (44)                     | 98 (43)                      |                         |
| Any subsidized <sup>b</sup>                                                                        | 5 (56)                     | 129 (57)                     |                         |
| Married/Partnered                                                                                  | 5 (56)                     | 94 (41)                      | .493 <sup>c</sup>       |
| Tumor stage                                                                                        |                            |                              | .058 <sup>c</sup>       |
| I                                                                                                  | 4 (44)                     | 148 (64)                     |                         |
| II                                                                                                 | 2 (22)                     | 65 (28)                      |                         |
| III                                                                                                | 3 (33)                     | 19 (8)                       |                         |
| Had multiple biopsies                                                                              | 2 (25)                     | 31 (14)                      | .314 <sup>c</sup>       |
| Had family history of breast cancer                                                                | 2 (25)                     | 105 (46)                     | .298 <sup>c</sup>       |
| Had prior history of breast cancer treatment                                                       | 1 (11)                     | 18 (8)                       | .529 <sup>c</sup>       |
| Had comorbidity (Charlson score 1-8)                                                               | 1 (11)                     | 82 (35)                      | .169 <sup>c</sup>       |

Bold denotes P < .05.

Abbreviation: SD = standard deviation.

<sup>a</sup>Patients with stage I to III estrogen receptor- and/or progesterone receptor-positive breast cancer who received hormone therapy.

<sup>b</sup>“Any subsidized” includes any Medicare, MassHealth (MA Medicaid), and/or any exchange product.

<sup>c</sup>Fisher exact test.

<sup>d</sup>t test.

<sup>e</sup>Mann-Whitney test.
